# Supplementary material for: Roles of ethanol and Si–OH in the aldol condensation of ethyl acetate over a Cs/SBA-15 catalyst
Source: Royal Society of Chemistry journal article supplement (doi:10.1039/d1re00020a), 2021-01-01
Supplement: d1re00020a1.pdf [file d1re00020a1.pdf]

## Electronic Supplementary Information

Roles of ethanol and Si-OH in aldol condensation of ethyl acetate over a Cs/SBA-15 catalyst

Xiang Tian and Hengshui Tian\*

College of Chemical Engineering, East China University of Science and Technology, Shanghai  
200237, People's Republic of China

\*Corresponding author:

Prof. Hengshui Tian

130 Meilong Road Xuhui District Shanghai city

200237 P. R. China

Tel.: +86 21 64252198

E-Mail: hengshuitian@126.com

This file includes fifteen figures and four tables:

**Fig. S1.** Wide-angle XRD patterns of the screened catalysts.

**Fig. S2.** N<sub>2</sub> adsorption-desorption isotherms and pore size distributions of the screened catalysts: (A) alkali metal and (B) alkaline earth metal.

**Fig. S3.** SEM images of the screened catalysts: (a) Mg/SBA-15, (b) Ca/SBA-15, (c) Sr/SBA-15, (d) K/SBA-15, (e) Rb/SBA-15, (f) Cs/SBA-15 and (g) SBA-15.

**Fig. S4.** X-ray photoelectron spectra of the (A) O 1s and (B) Si 2p region: (a) SBA-15, (b) K/SBA-15, (c) Rb/SBA-15, (d) Cs/SBA-15, (e) Mg/SBA-15, (f) Ca/SBA-15, and (g) Sr/SBA-15.

**Fig. S5.** Pyridine-FTIR spectra for xCs/SBA-15 catalyst.

**Fig. S6.** XRD patterns of SBA-15 and the Cs/SBA-15 with different loading: (A) small-angle and (B) wide-angle.

**Fig. S7.** N<sub>2</sub> adsorption-desorption isotherms and pore size distributions of SBA-15 and xCs/SBA-15 catalyst.

**Fig. S8.** The depictures of (A) model of SBA-15 and (B) model of Cs/SBA-15.

**Fig. S9.** The scheme and the total energy diagram for the pathway of aldol condensation between Ea and FA through the route of enol structure on the active surface model of Cs/SBA-15.

**Fig. S10.** The scheme and the total energy diagram for the pathway of aldol condensation between Ea and FA through the straight condensation on the active surface model of Cs/SBA-15.

**Fig. S11.** Change of Gibbs free energy in enol structure formation without silicon hydroxyl on the active surface model of Cs/SBA-15.

**Fig. S12.** Change of Gibbs free energy for the hydrolysis pathway of Ea on the active surface model of Cs/SBA-15.

**Fig. S13.** Change of Gibbs free energy for the aldol condensation pathway of Aa and FA on the active surface model of Cs/SBA-15.

**Fig. S14.** Change of Gibbs free energy for the hydrolysis pathway of EA on the active surface model of Cs/SBA-15.

**Fig. S15.** Conformations of the different substrates in adsorption state.

**Table S1** Catalytic performance of xCs/SBA-15 on aldol condensation of ethyl acetate and FA in stability tests.

**Table S2.** The change of Gibbs free energies of the substitution for Cs-O(x)-SBA-15.

**Table S3.** The distances between atoms of conformations the ethanol dehydrogenation process.

**Table S4.** The structural parameters for the optimized geometries of the molecules during the activation process to form enol structure from ethyl acetate involving silicon hydroxyl.

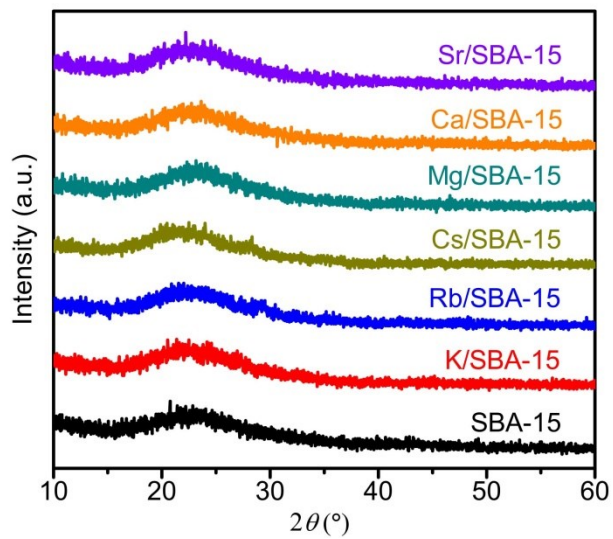

**Fig. S1.** Wide-angle XRD patterns of the screened catalysts.

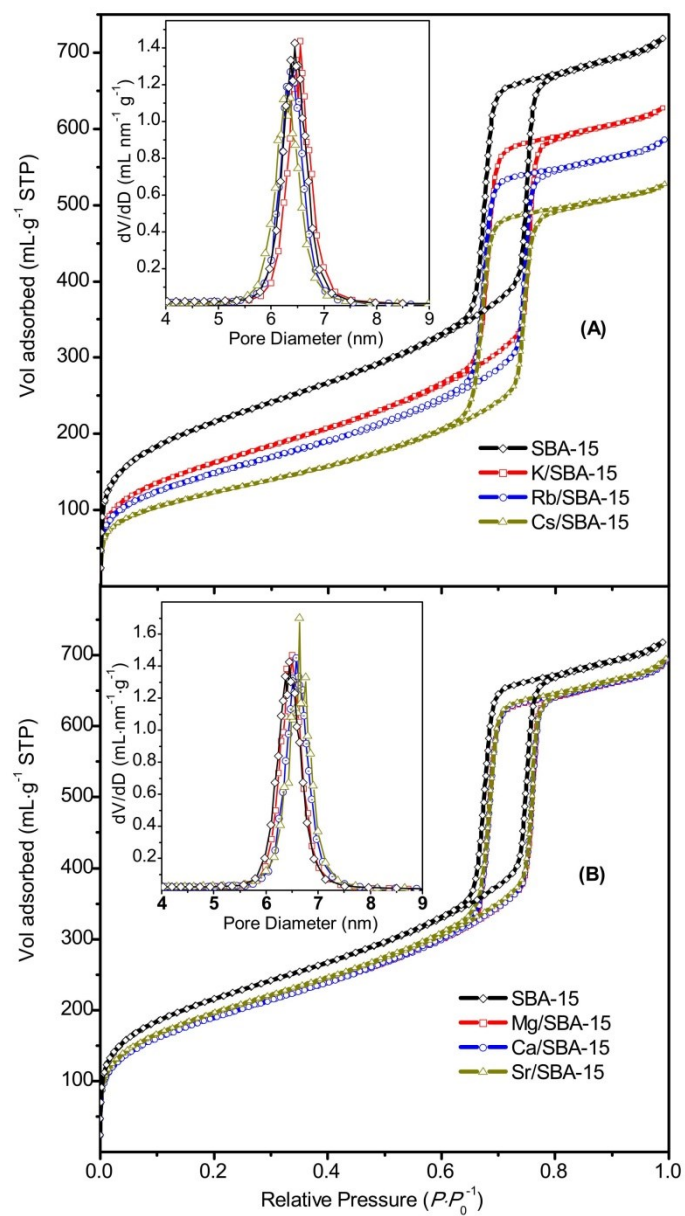

**Fig. S2.**  $N_2$  adsorption-desorption isotherms and pore size distributions of the screened catalysts: (A) alkali metal and (B) alkaline earth metal.

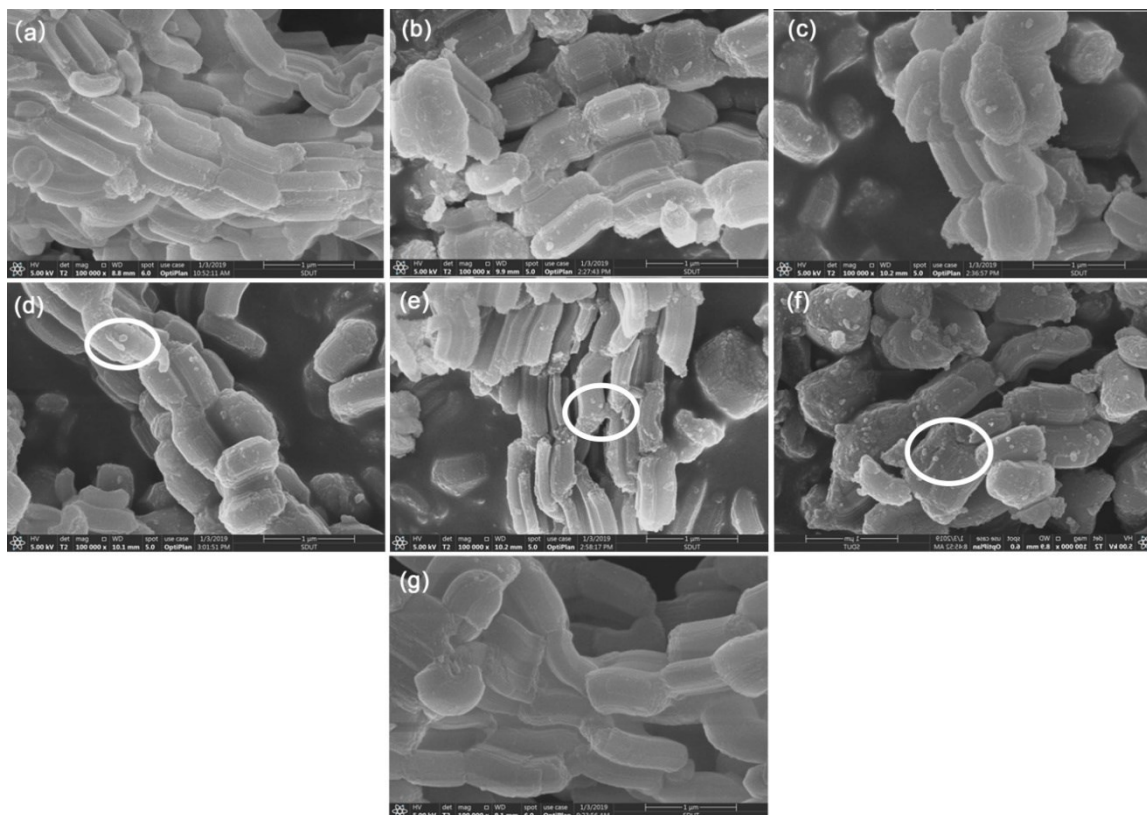

**Fig. S3.** SEM images of the screened catalysts: (a) Mg/SBA-15, (b) Ca/SBA-15, (c) Sr/SBA-15, (d) K/SBA-15, (e) Rb/SBA-15, (f) Cs/SBA-15 and (g) SBA-15.

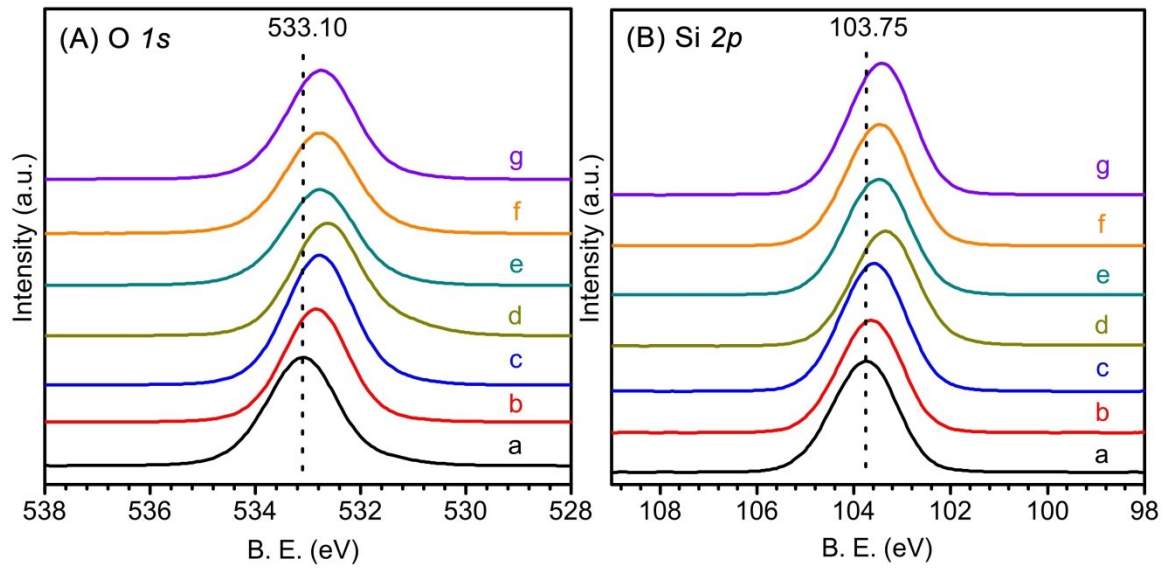

**Fig. S4.** X-ray photoelectron spectra of the (A) O 1s and (B) Si 2p region: (a) SBA-15, (b) K/SBA-15, (c) Rb/SBA-15, (d) Cs/SBA-15, (e) Mg/SBA-15, (f) Ca/SBA-15, and (g) Sr/SBA-15.

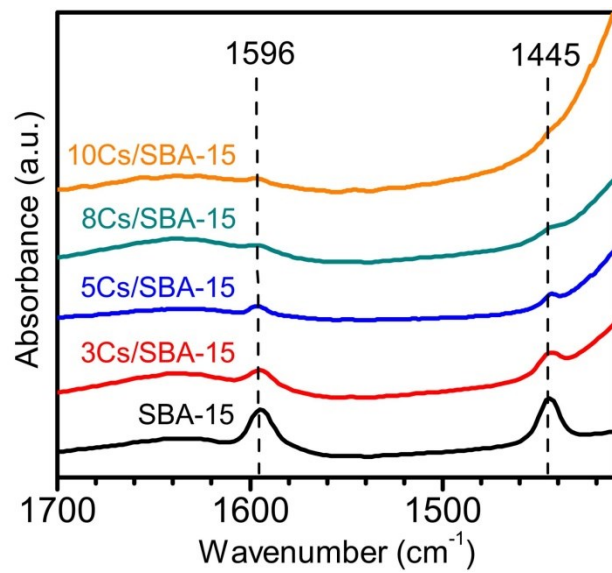

**Fig. S5.** Pyridine-FTIR spectra for xCs/SBA-15 catalyst.

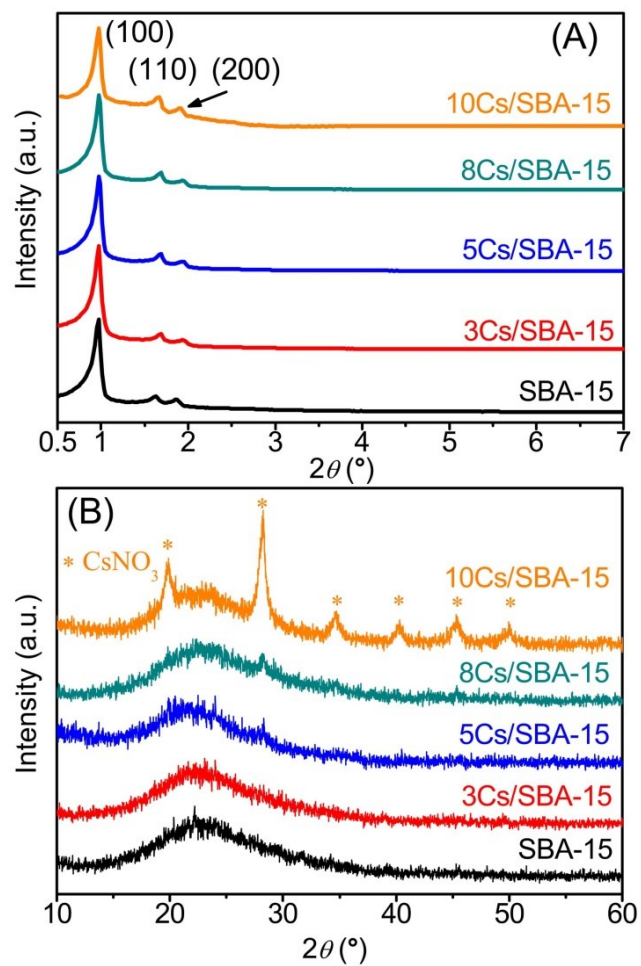

**Fig. S6.** XRD patterns of SBA-15 and the Cs/SBA-15 with different loading: (A) small-angle and (B) wide-angle.



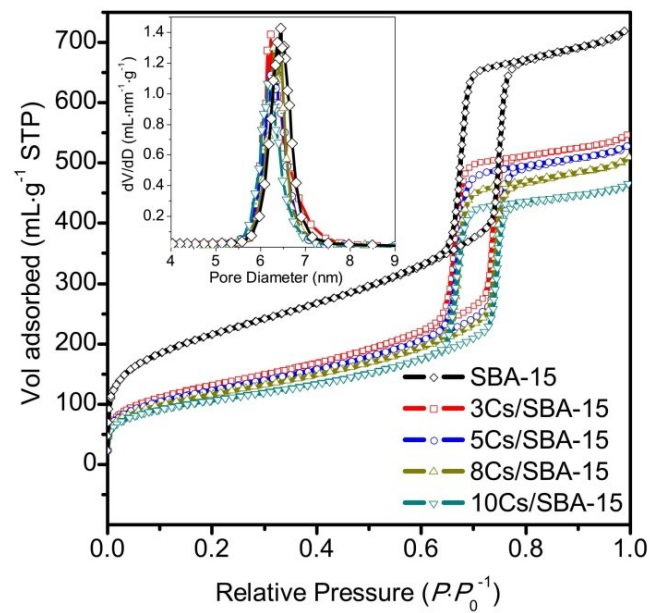

**Fig. S7.** N<sub>2</sub> adsorption-desorption isotherms and pore size distributions of SBA-15 and xCs/SBA-15 catalyst.

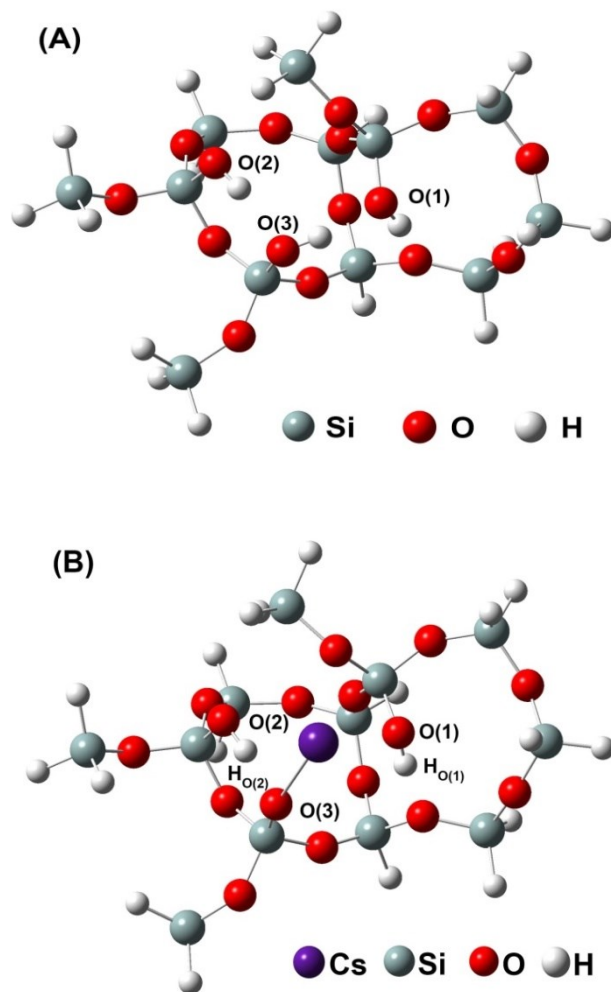

**Fig. S8.** The depictures of (A) model of SBA-15 and (B) model of Cs/SBA-15.

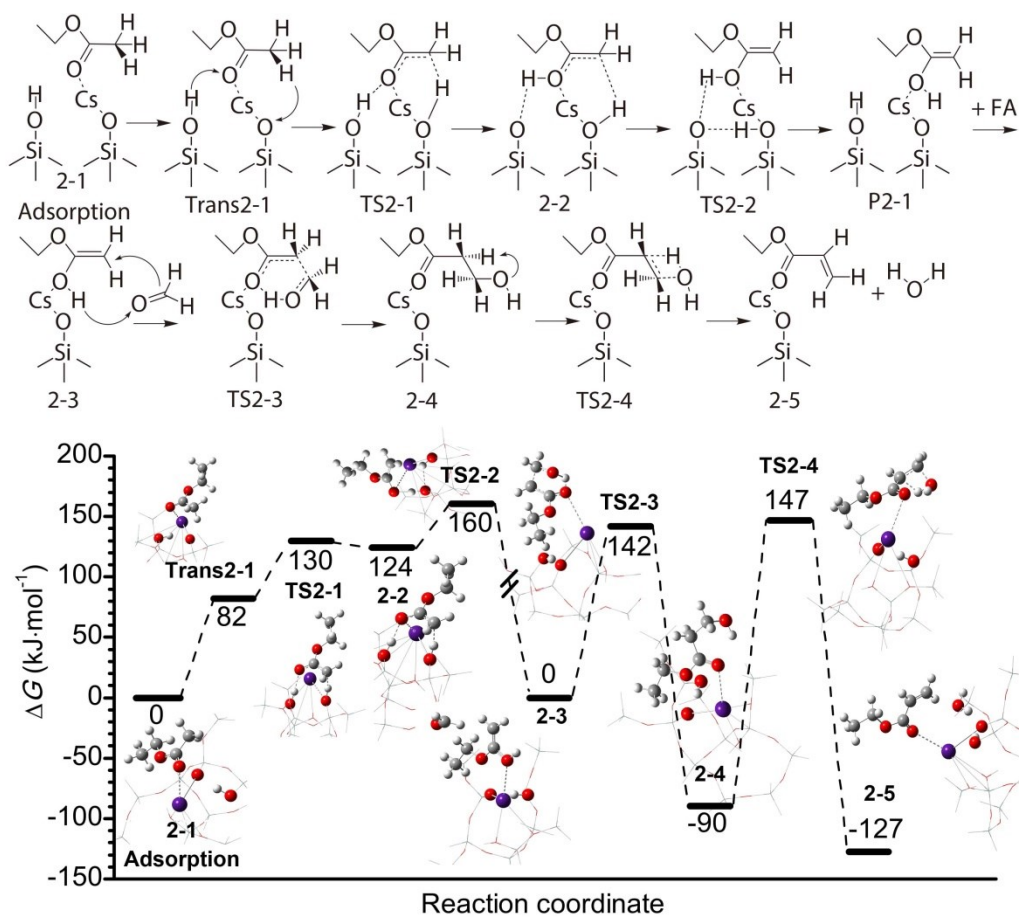

**Fig. S9.** The scheme and the total energy diagram for the pathway of aldol condensation between Ea and FA through the route of enol structure on the active surface model of Cs/SBA-15. Two parallel bars indicate that the contribution of FA starts to be included.

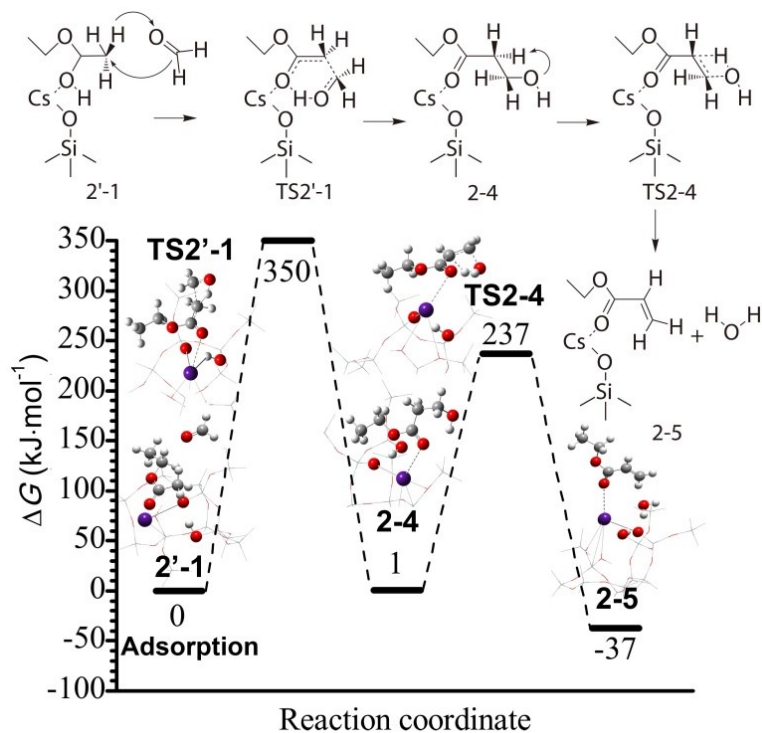

**Fig. S10.** The scheme and the total energy diagram for the pathway of aldol condensation between Ea and FA through the straight condensation on the active surface model of Cs/SBA-15.

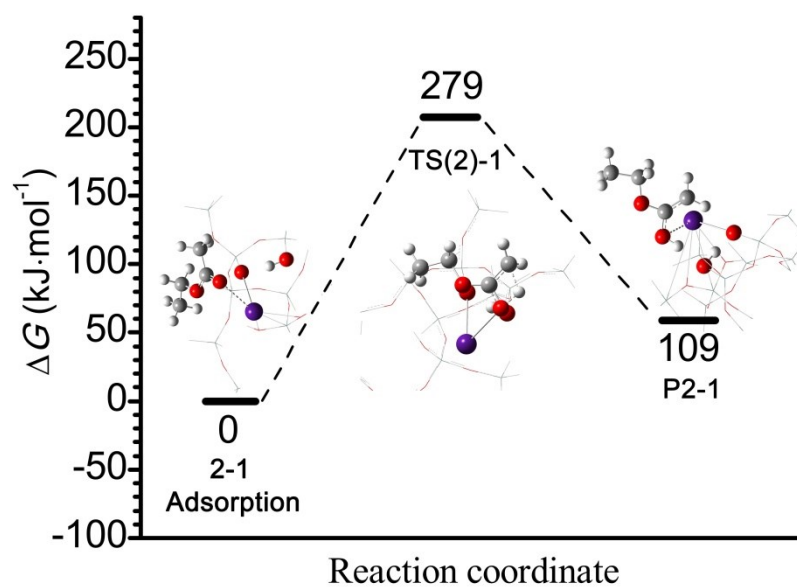

**Fig. S11.** Change of Gibbs free energy in enol structure formation without silicon hydroxyl on the active surface model of Cs/SBA-15.

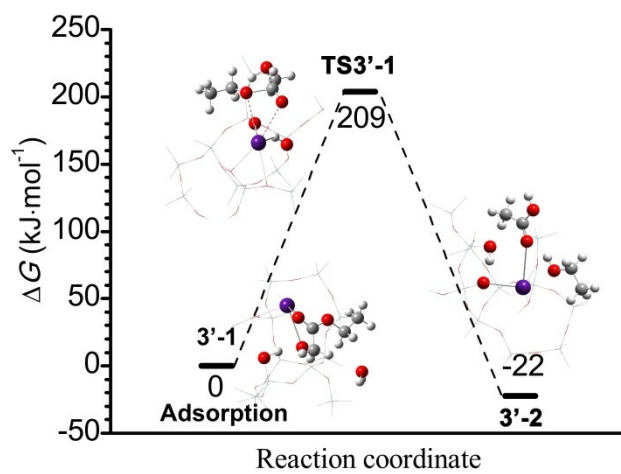

**Fig. S12.** Change of Gibbs free energy for the hydrolysis pathway of Ea on the active surface model of Cs/SBA-15.

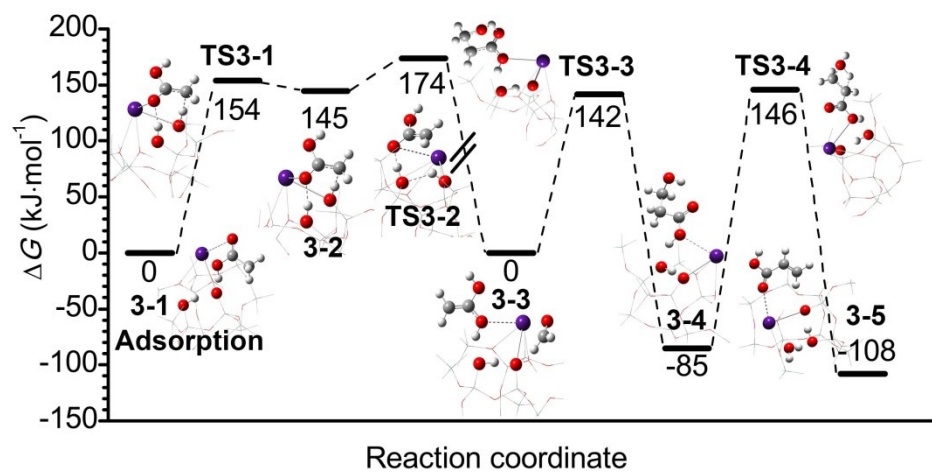

**Fig. S13.** Change of Gibbs free energy for the aldol condensation pathway of Aa and FA on the active surface model of Cs/SBA-15.

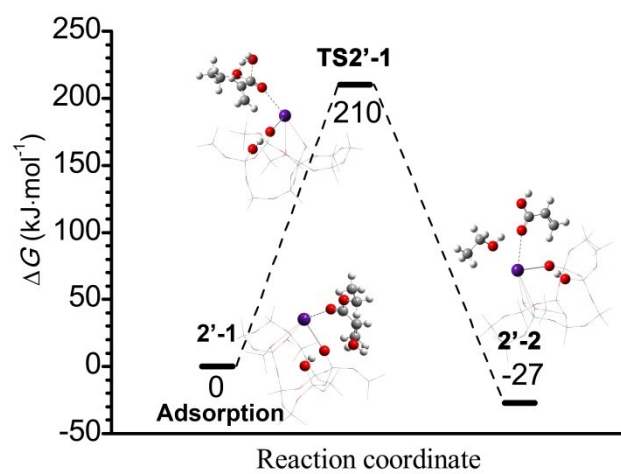

**Fig. S14.** Change of Gibbs free energy for the hydrolysis pathway of EA on the active surface model of Cs/SBA-15.



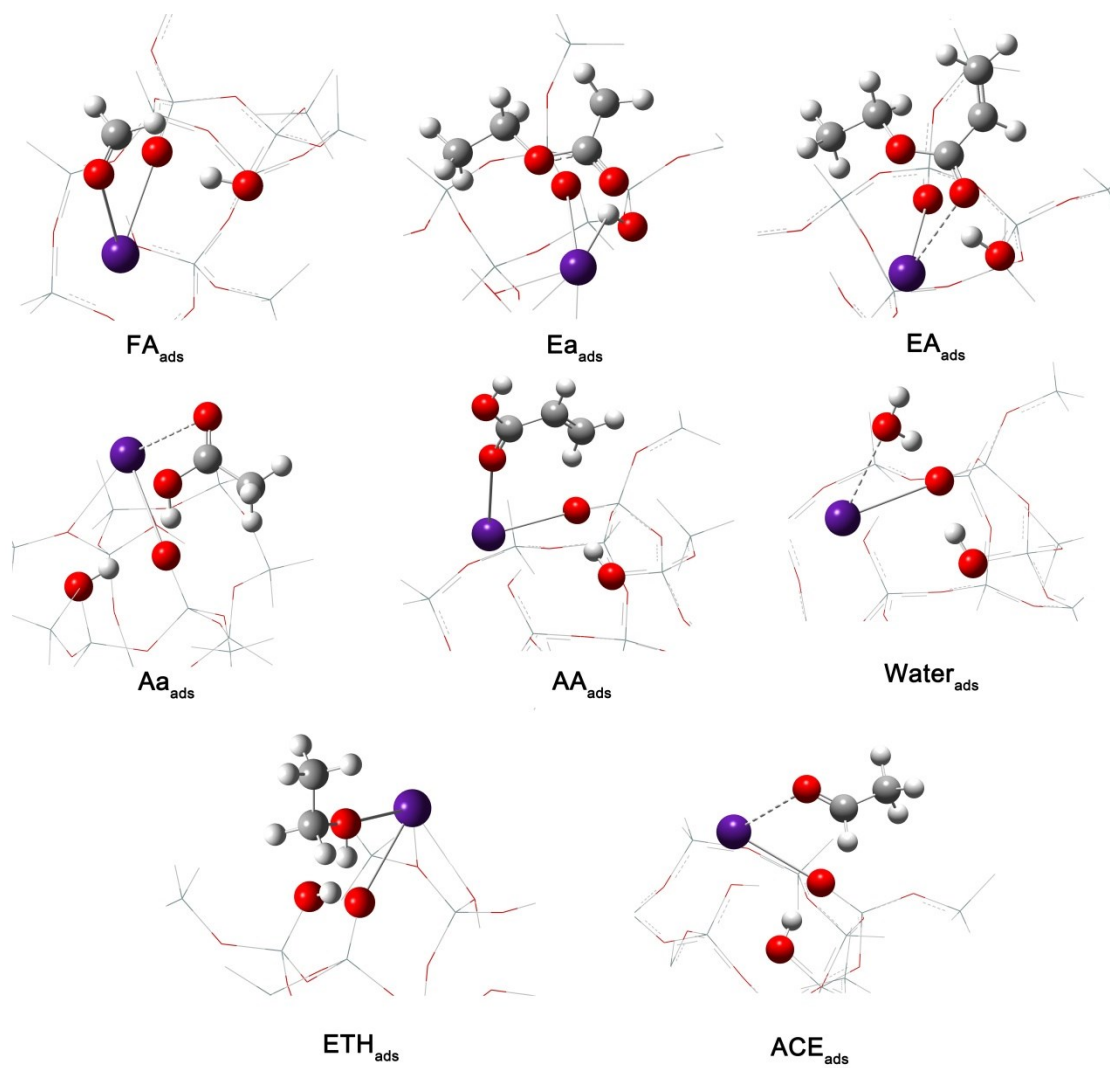

**Fig. S15.** Conformations of the different substrates in adsorption state.

**Table S1** Catalytic performance of xCs/SBA-15 on aldol condensation of ethyl acetate and FA in stability tests.<sup>a</sup>

| Loading<br>(wt. %) | Time<br>(h) | TOF (h <sup>-1</sup> ) |      |     |     |                                    |     | Y(S) (%) |                     | Molar<br>ratio <sup>d</sup> | B <sub>m</sub><br>(%) |
|--------------------|-------------|------------------------|------|-----|-----|------------------------------------|-----|----------|---------------------|-----------------------------|-----------------------|
|                    |             | EA+AA                  | ACE  | Ma  | ACR | SUM <sub>ACE</sub><br><sub>b</sub> | PA  | EA+AA    | Others <sup>c</sup> |                             |                       |
| 3                  | 2+3         | 103.3                  | 16.4 | 2.0 | 2.8 | 21.2                               | 8.3 | 61(88)   | 8(12)               | 7.7                         | 98                    |
|                    | 4+5         | 101.9                  | 16.5 | 1.9 | 2.7 | 21.1                               | 8.1 | 60(89)   | 7(11)               | 8.2                         | 98                    |
|                    | 6+7         | 98.9                   | 16.3 | 1.7 | 2.3 | 20.3                               | 7.7 | 58(89)   | 7(11)               | 8.8                         | 96                    |
| 5                  | 2+3         | 65.3                   | 10.6 | 3.1 | 3.8 | 17.5                               | 4.5 | 63(85)   | 11(15)              | 3.2                         | 97                    |
|                    | 4+5         | 61.2                   | 12.1 | 2.6 | 2.8 | 17.5                               | 4.3 | 59(86)   | 9(14)               | 4.1                         | 96                    |
|                    | 6+7         | 57.9                   | 12.7 | 2.2 | 2.8 | 17.7                               | 5.3 | 56(85)   | 10(15)              | 5.0                         | 94                    |
| 8                  | 2+3         | 39.9                   | 4.5  | 1.3 | 1.8 | 7.6                                | 2.6 | 60(87)   | 9(13)               | 3.0                         | 94                    |
|                    | 4+5         | 36.4                   | 4.8  | 1.1 | 1.6 | 7.5                                | 2.6 | 55(87)   | 8(13)               | 4.0                         | 93                    |
|                    | 6+7         | 33.6                   | 5.5  | 1.1 | 1.5 | 8.1                                | 2.8 | 50(86)   | 8(14)               | 4.6                         | 92                    |
| 10                 | 2+3         | 31.3                   | 3.7  | 1.2 | 1.3 | 6.2                                | 2.1 | 58(87)   | 8(13)               | 2.6                         | 92                    |
|                    | 4+5         | 28.7                   | 3.9  | 1.1 | 1.2 | 6.1                                | 2.4 | 53(86)   | 8(14)               | 3.1                         | 91                    |
|                    | 6+7         | 26.5                   | 4.2  | 0.9 | 1.1 | 6.2                                | 1.8 | 49(87)   | 7(13)               | 3.7                         | 88                    |

EA, AA, ACE, Ma, ACR, and PA represent ethyl acrylate, acrylic acid, acetaldehyde, methyl acetate, acrolein and propionic acid, respectively.

<sup>a</sup> Trxn = 663 K, SV = 20 mL·h<sup>-1</sup>·g<sub>cat</sub><sup>-1</sup>, *n*(formaldehyde): *n*(ethyl acetate): *n*(ethanol) = 1: 2.5: 4

<sup>b</sup> Summed TOF for ACE, Ma and ACR.

<sup>c</sup> Summed yield (selectivity) for Ma, ACR and PA.

<sup>d</sup> Molar ratio of AA/EA in product.

**Table S2** The change of Gibbs free energies of the substitution for Cs-O(x)-SBA-15.

| Model          | $\Delta G_{\text{Cs-O}(x)\text{-SBA-15}}$ (kJ/mol) |
|----------------|----------------------------------------------------|
| Cs-O(1)-SBA-15 | -386.10                                            |
| Cs-O(2)-SBA-15 | -432.67                                            |
| Cs-O(3)-SBA-15 | -445.08                                            |

**Table S3** The distances between atoms of conformations in the ethanol dehydrogenation process.

| Models   | Distance between two atoms (Å)   |                                |                                    |                                     |                                     |                                     |
|----------|----------------------------------|--------------------------------|------------------------------------|-------------------------------------|-------------------------------------|-------------------------------------|
|          | C <sub>α</sub> -O <sub>ETH</sub> | C <sub>α</sub> -H <sub>α</sub> | O <sub>ETH</sub> -H <sub>ETH</sub> | H <sub>O(2)</sub> -O <sub>ETH</sub> | H <sub>O(2)</sub> -O <sub>(2)</sub> | H <sub>ETH</sub> -O <sub>base</sub> |
| 1-1      | 1.42                             | 1.10                           | 1.00                               | -                                   | -                                   | -                                   |
| Trans1-1 | 1.42                             | 1.10                           | 1.03                               | 1.90                                | 0.98                                | 1.51                                |
| TS1-1    | 1.25                             | 1.72                           | 2.61                               | 1.80                                | 0.99                                | 1.28                                |
| 1-2      | -                                | -                              | -                                  | -                                   | -                                   | -                                   |

**Table S4** The structural parameters for the optimized geometries of the molecules during the activation process to form enol structure from ethyl acetate involving silicon hydroxyl.

| Models   | Dihedral angle(°)                                                      |                                                                     | Distance between two atoms (Å) |                                   |                                     |                                     |
|----------|------------------------------------------------------------------------|---------------------------------------------------------------------|--------------------------------|-----------------------------------|-------------------------------------|-------------------------------------|
|          | H <sub>O(2)</sub> -O <sub>(2)</sub> -C <sub>S</sub> -O <sub>base</sub> | O <sub>(2)</sub> -O <sub>base</sub> -C <sub>S</sub> -H <sub>α</sub> | H <sub>α</sub> -C <sub>α</sub> | H <sub>α</sub> -O <sub>base</sub> | H <sub>O(2)</sub> -O <sub>(2)</sub> | H <sub>O(2)</sub> -O <sub>(c)</sub> |
| 2-1      | -                                                                      | -                                                                   | -                              | -                                 | -                                   | -                                   |
| Trans2-1 | 13                                                                     | 101                                                                 | 1.10                           | 2.04                              | 1.00                                | 2.42                                |
| TS 2-1   | 85                                                                     | 94                                                                  | 1.55                           | 1.13                              | 1.00                                | 1.74                                |
| 2-2      | 86                                                                     | 94                                                                  | 1.73                           | 1.06                              | 1.00                                | 1.68                                |
| TS2-2    | 126                                                                    | 36                                                                  | 2.50                           | 0.98                              | 1.07                                | 1.41                                |
| P 2-1    | 126                                                                    | ~0                                                                  | 3.42                           | 1.48                              | 1.79                                | 0.99                                |
